# Supplementary material for: Endothelial Cells Use a Formin-Dependent Phagocytosis-Like Process to Internalize the Bacterium Listeria monocytogenes
Source: PubMed Central journal article supplement (PMC4859537; doi:10.1371/journal.ppat.1005603), 2016-05-06
Supplement: ppat.1005603.s015.pdf [file ppat.1005603.s015.pdf]

**Supplementary Table 3: Bacterial strains used in this study**

| Name and source                                                           | Species                        | Genotype/Description                                               |
|---------------------------------------------------------------------------|--------------------------------|--------------------------------------------------------------------|
| JAT115 (from Portnoy Lab)                                                 | <i>L. monocytogenes</i> 10403S | Wild-type                                                          |
| JAT314 (DP-L2161)[95]                                                     | <i>L. monocytogenes</i> 10403S | <i>hly</i>                                                         |
| JAT638 (DP-L392)[83]                                                      | <i>L. innocua</i>              |                                                                    |
| JAT745 (DP-L4044)[26]                                                     | <i>L. monocytogenes</i> 10403S | LLO <sup>G486D</sup>                                               |
| JAT983 (This study)                                                       | <i>L. monocytogenes</i> 10403S | LLO <sup>G486D</sup><br>actAp::mTagRFP                             |
| JAT984 (DP-L4560)[27]                                                     | <i>L. monocytogenes</i> 10403S | LLO <sup>G486D</sup> $\Delta$ actA                                 |
| JAT985 (This study)                                                       | <i>L. monocytogenes</i> 10403S | LLO <sup>G486D</sup> $\Delta$ actA<br>actAp::mTagRFP               |
| JAT1084 (DP-L4404)[96]                                                    | <i>L. monocytogenes</i> 10403S | $\Delta$ inLAB                                                     |
| JAT1116 (This study)                                                      | <i>L. monocytogenes</i> 10403S | LLO <sup>G486D</sup> $\Delta$ inLAB                                |
| JAT1119 (This study)                                                      | <i>L. monocytogenes</i> 10403S | LLO <sup>G486D</sup> $\Delta$ inLAB<br>actAp::mTagRFP              |
| JAT1045 (This study)                                                      | <i>L. monocytogenes</i> 10403S | LLO <sup>G486D</sup><br>Constitutive sGFP                          |
| JAT1046 (This study)                                                      | <i>L. monocytogenes</i> 10403S | LLO <sup>G486D</sup> $\Delta$ inLAB<br>Constitutive sGFP           |
| JAT607 (This study, also see others[28])                                  | <i>L. monocytogenes</i> 10403S | 10403S<br>actAp::mTagRFP                                           |
| JAT610 (This study)                                                       | <i>L. monocytogenes</i> 10403S | 10403S $\Delta$ actA<br>actAp::mTagRFP                             |
| JAT602 (This study, also see others[85])                                  | <i>E. coli</i> SM10            | Carries plasmid pPL499                                             |
| JAT609 (This study, also see others[85])                                  | <i>E. coli</i> SM10            | Carries plasmid pMP74                                              |
| JAT1223 (This study, DP-E4043 (Portnoy Lab), carries the plasmid in DH5a) | <i>E. coli</i> SM10            | Carries plasmid pCON1 with the LLO <sup>G486D</sup> point mutation |

95. Jones S, Portnoy DA (1994) Characterization of *Listeria monocytogenes* pathogenesis in a strain expressing perfringolysin O in place of listeriolysin O. *Infect Immun* 62: 5608-5613.

96. Bakardjiev AI, Theriot JA, Portnoy DA (2006) *Listeria monocytogenes* traffics from maternal organs to the placenta and back. *PLoS Pathog* 2: e66.
