# Supplementary material for: Endothelial Cells Use a Formin-Dependent Phagocytosis-Like Process to Internalize the Bacterium Listeria monocytogenes
Source: PubMed Central journal article supplement (PMC4859537; doi:10.1371/journal.ppat.1005603), 2016-05-06
Supplement: ppat.1005603.s016.pdf [file ppat.1005603.s016.pdf]

**Supplementary Table 4: Synthetic siRNA pools used in this study.**

| Accession Number     | Gene (Protein)              | Product Name                                 | Catalog Number |
|----------------------|-----------------------------|----------------------------------------------|----------------|
|                      | Negative Control            | ON-TARGETplus Non-Targeting Pool             | D-001810-10    |
| NM_001005386         | <i>ACTR2</i> (Arp2)         | SMARTpool: siGENOME ACTR2 siRNA              | M-012076-01    |
| NM_001173            | <i>ARHGAP5</i> (p190RhoGAP) | SMARTpool: ON-TARGETplus Human ARHGAP5 siRNA | L-009580-00    |
| NM_001162383         | <i>ARHGEF2</i> (GEFH1)      | SMARTpool: ON-TARGETplus Human ARHGEF2 siRNA | L-009883-00    |
| NM_152862, NM_005731 | <i>ARPC2</i> (p34-Arc)      | SMARTpool: siGENOME ARPC2 siRNA              | M-012081-00    |
| NM_005219            | <i>DIAPH1</i>               | SMARTpool: ON-TARGETplus Human DIAPH1 siRNA  | L-010347-00    |
| NM_007309            | <i>DIAPH2</i>               | SMARTpool: ON-TARGETplus Human DIAPH2 siRNA  | L-012029-00    |
| NM_030932            | <i>DIAPH3</i>               | SMARTpool: ON-TARGETplus Human DIAPH3 siRNA  | L-018997-00    |
| NM_005892            | <i>FMNL1</i>                | SMARTpool: ON-TARGETplus Human FMNL1 siRNA   | L-019176-00    |
| NM_052905            | <i>FMNL2</i>                | SMARTpool: ON-TARGETplus Human FMNL2 siRNA   | L-031993-01    |
| NM_198900            | <i>FMNL3</i>                | SMARTpool: ON-TARGETplus Human FMNL3 siRNA   | L-019007-02    |
| NM_014992            | <i>DAAM1</i>                | SMARTpool: ON-TARGETplus Human DAAM1 siRNA   | L-012925-00    |
| NM_015345            | <i>DAAM2</i>                | SMARTpool: ON-TARGETplus Human DAAM2 siRNA   | L-014010-00    |
| NM_013241            | <i>FHOD1</i>                | SMARTpool: ON-TARGETplus Human FHOD1 siRNA   | L-013709-01    |
| NM_025135            | <i>FHOD3</i>                | SMARTpool: ON-TARGETplus Human FHOD3         | L-023411-01    |

|              |                | siRNA                                        |             |
|--------------|----------------|----------------------------------------------|-------------|
| XM_375185    | <i>FMN1</i>    | SMARTpool: ON-TARGETplus Human FMN1 siRNA    | L-030385-00 |
| NM_020066    | <i>FMN2</i>    | SMARTpool: ON-TARGETplus Human FMN2 siRNA    | L-022134-02 |
| NM_001145118 | <i>GRID2IP</i> | SMARTpool: ON-TARGETplus Human GRID2IP siRNA | L-029054-01 |
| NM_033393    | <i>FHDC1</i>   | SMARTpool: ON-TARGETplus Human FHDC1 siRNA   | L-024060-02 |
| NM_001031714 | <i>INF2</i>    | SMARTpool: ON-TARGETplus Human INF2 siRNA    | L-014097-02 |
