# Supplementary material for: Endothelial Cells Use a Formin-Dependent Phagocytosis-Like Process to Internalize the Bacterium Listeria monocytogenes
Source: PubMed Central journal article supplement (PMC4859537; doi:10.1371/journal.ppat.1005603), 2016-05-06
Supplement: ppat.1005603.s017.pdf [file ppat.1005603.s017.pdf]

**Supplementary Table 5: RTqPCR primers used in this study.**

| Gene of Interest   | Forward Primer           | Reverse Primer          | Primer Bank ID |
|--------------------|--------------------------|-------------------------|----------------|
| ACTR2              | AACCTCGGCAGTATTAGAAAAGGA | CCTCTCCGATGGGTATCATGTG  | 154354973c1    |
| CDH5               | AAGCGTGAGTCGCAAGAATG     | TCTCCAGGTTTTTCGCCAGTG   | 166362712c2    |
| FHOD1              | GGGTCAACGCTATCTTGAAA     | CAGCCCCTCTGAATGCACAA    | 118572598c2    |
| FMNL3              | AGTACGGATTCAACCTGGTCA    | GCAGCTCCTTGCATACCTCTTT  | 119120873c2    |
| GAPDH-1            | GGAGCGAGATCCCTCCAAAAT    | GGCTGTTGTCATACTTCTCATGG | 378404907c1    |
| ARHGEF2<br>(GEFH1) | CAGGCATGACCATGTGCTATG    | TTTACAGCGGTTGTGGATAGTC  | 253735771c1    |
| GRID2IP            | AGCTTCGGCTTCACACTTCG     | TCCAGAGAATCGGAGTCACTG   | 223278402c1    |
| GRID2IP            | GAAGCCGCGATACTGACCG      | CCGCTCATTGGTTACGAAGC    | 223278402c3    |
| INF2               | GTGGAACATTTTCCGCGAGTA    | GCCCATACAAAGGCGTTCG     | 151101234c1    |
| MYH9               | CAGCAAGCTGCCGATAAGTAT    | CTTGTCGGAAGGCACCCAT     |                |
| MYO9A              | AAGTGGAGAGGACTACCGCTT    | TGTTACCCGTAGCCATGACTG   | 365192551c1    |
| PFN1               | TCAAGTTTTTACGTGAATGGGCT  | CGAAGATCCATGCTAAATTCCCC | 16753213c2     |
| PTK2<br>(FAK)      | TGGTGCAATGGAGCGAGTATT    | CAGTGAACCTCCTCTGACCG    | 313851041c2    |
| RHOA               | GGAAAGCAGGTAGAGTTGGCT    | GGCTGTCGATGGAAAAACACAT  | 50593005c2     |
| ROCK1              | AAGTGAGGTTAGGGCGAAATG    | AAGGTAGTTGATTGCCAACGAA  | 112382209c3    |
